# Supplementary material for: Inhibition of type I PRMTs reforms muscle stem cell identity enhancing their therapeutic capacity
Source: eLife. 2023 Jun 7;12:RP84570. doi: 10.7554/eLife.84570 (PMC10328524; doi:10.7554/eLife.84570)
Supplement: Supplementary file 1. — Quiescence 1 and 2 (Q1 and Q2), myoblast clusters 1–5 (M1-M5), and differentiated myoblasts 1 and 2 (DM1 and DM2) clusters. [file elife-84570-supp1.xlsx]

## Sheet: Cluster markers
Q1	Q2	M1	M2	M3	M4	M5	DM1	DM2	C1			0_p	1_p	2_p	3_p	4_p	5_p	6_p	7_p	8_p	9_p
Ahnak	Adamts1	0610012G03Rik	Anp32b	Aprt	Anp32b	2010107E04Rik	Ilkap	Nexn	Nes			0	0	0	0	0	0	2.59543e-299	0	0	5.89113e-114
Anxa5	Ahnak	1110008F13Rik	Cks1b	Atox1	Cks1b	Anapc13	Enah	Tmsb4x	Pdlim1			0	0	0	0	0	0	5.08526e-267	0	0	3.7606e-110
Arid5b	Arl4d	1110008P14Rik	Dek	Atpif1	Dek	Anp32b	Cops9	Ogn	Adam19			0	0	0	0	0	0	3.3963e-244	0	0	2.32028e-109
Arl4d	AY036118	2610001J05Rik	Dut	Bax	Dnajc9	Arl6ip1	Slc29a1	Tnnc2	Tagln			0	0	0	1.48566e-283	0	0	4.34686e-241	0	0	8.46731e-90
AY036118	Bag3	Abracl	Hmgb2	Cald1	Dut	Atad2	Sh3glb1	Csrp3	Cyba			0	0	0	1.56326e-261	0	0	3.11623e-238	0	0	6.66607e-83
Btg1	Bhlhe40	Ahnak2	Lsm2	Calr	Hmgb2	Atp5a1	Mylk4	Hacd1	Metrnl			0	0	0	4.15906e-250	0	0	1.27979e-228	0	0	2.06558e-81
Cd200	Btg1	Ak1	Pclaf	Ccnd1	Lsm2	Atp5j2	Myog	Myl4	Itgb1			0	0	0	9.35117e-241	0	0	2.05402e-223	0	0	1.29715e-80
Cebpb	Btg2	Anxa1	Ranbp1	Cd81	Lsm8	Atp5k	Ralgps2	Klf5	Lpp			0	0	0	5.8835e-237	0	0	3.42857e-220	0	0	4.96591e-79
Cebpd	Cavin2	Aprt	Rrm2	Cdkn2a	Pclaf	Birc5	Ndufv3	Arpp21	Thbs1			0	0	0	2.88464e-233	0	0	4.40249e-220	0	0	1.71488e-75
Cfh	Ccnl1	Arhgap22	Snrpd1	Col18a1	Pfn1	Ccdc34	Myl1	Cacng1	Calm1			0	0	0	3.5369e-213	0	0	6.62158e-210	0	0	2.40092e-74
Chodl	Cd200	Arpc1b	Arl6ip1	Cox7b	Ppia	Ccnd3	Dbn1	Tnnt1	Mcam			0	0	0	1.3165e-210	0	0	9.0651e-205	0	0	9.09742e-74
Chrdl2	Cebpb	Arpc2	Birc5	Csf1	Ran	Cdca8	Hacd1	Mylk4	Aebp1			0	0	0	2.05545e-201	0	0	3.87222e-204	0	0	3.90938e-72
Clcf1	Cebpd	Ass1	Ccdc34	Eef1g	Ranbp1	Cdk1	Aldoa	Bin1	Col1a1			0	0	0	2.28801e-193	0	0	8.07016e-201	0	0	9.56255e-72
Clmn	Chodl	Atp6v0e	Cdca8	Flna	Rrm2	Cdk4	Ndufc1	Inppl1	Nrp1			0	0	0	4.0836e-190	0	0	8.55738e-198	0	0	4.30559e-70
Crlf1	Chrdl2	Atp6v1g1	Cdk1	Gpx1	Snrpd1	Cenpf	Fndc5	Myh1	Fxyd5			0	0	0	2.54183e-181	0	0	6.24428e-197	0	0	8.56363e-65
Ctsl	Clk1	Atpif1	Cenpf	Hmga2	Tyms	Cks1b	Tnni1	Cryab	Col1a2			4.33403e-304	0	0	4.37001e-181	0	0	6.87305e-194	0	0	2.49806e-64
Dag1	Clmn	Bax	H2afv	Hsp90ab1	1810037I17Rik	Cox5a	Nes	Svbp	App			6.46128e-298	0	0	1.58858e-176	0	0	8.79046e-189	0	0	2.84666e-64
Ddx5	Crlf1	Btf3	H2afx	Hsp90b1	Abracl	Cox6c	Elob	Casq2	Rgs16			3.66192e-296	0	0	2.78704e-175	0	0	3.00559e-188	0	0	3.32708e-63
Dpt	Dag1	Cald1	Hmgb1	Lgals3	Aprt	Cox7a2	Usmg5	Mb	Myh9			1.08512e-291	0	0	1.61557e-166	0	0	7.65289e-183	5.43474e-302	0	4.58359e-63
Eef1a1	Ddx5	Calm1	Mki67	Mgp	Atad2	Crip2	Lmod3	Col25a1	Pea15a			1.37673e-286	0	0	1.46445e-160	0	0	2.01742e-180	4.91694e-296	0	8.28433e-60
Egr1	Dnajb1	Capg	Nucks1	Myl6	Ccnd1	Ddx39b	Myh3	Fst	Ostf1			3.52289e-277	0	0	7.93135e-153	0	0	4.00877e-176	5.58063e-296	0	1.20899e-59
Emp1	Dpt	Ccnd1	Prc1	Naca	Ccne1	Dek	Sct	Hes6	Sfrp1			1.54246e-270	0	0	3.46011e-149	0	0	8.79952e-173	3.85934e-289	0	1.53754e-59
Erfe	Edn3	Ccng1	Smc2	Npc2	Ccne2	Dut	Acta1	Hspb2	Serpine1			4.68078e-266	0	0	6.87134e-149	0	0	3.88415e-171	1.95862e-266	0	5.23297e-59
Errfi1	Eef1a1	Cd44	Smc4	Pdia6	Cenph	Gapdh	Lsm6	Smpx	Kitl			6.39838e-261	0	0	8.40984e-147	0	0	6.53487e-171	1.68563e-263	0	4.29162e-58
F2r	Eef2	Cd63	Spc24	Peg3	Cfl1	Gmnn	Ppp1r14b	Tnni2	Flna			1.10389e-257	0	0	3.13208e-143	0	0	2.91359e-160	2.10458e-263	0	6.30051e-58
Fgfr1	Egr1	Cdh11	Stmn1	Pgd	Chaf1a	H2afv	Ldha	Iffo1	Pdgfa			3.15896e-257	0	0	3.37707e-143	0	0	1.1006e-159	5.49803e-259	0	9.36232e-58
Flnc	Errfi1	Cfl1	Tmpo	Phlda3	Clspn	H2afx	Cox8a	Lmod2	Ets1			8.06146e-256	0	0	6.94856e-140	0	0	2.39166e-158	2.71262e-254	0	3.76188e-57
Frmd6	Fgfr1	Chmp5	Top2a	Prdx2	Dctpp1	Hint1	Vasp	Lmo7	Pdlim5			2.33254e-254	0	0	9.79801e-139	0	0	1.34414e-156	3.03866e-254	0	1.87855e-56
Gal	Fos	Chst2	Tpx2	Rack1	Dhfr	Hist1h1b	Tnnc1	Cav3	Col5a2			1.10875e-252	0	0	4.14629e-133	0	0	9.89425e-154	2.65032e-252	0	2.40399e-56
Gm26917	Fosb	Cited2	Tubb4b	Rasa1	Dnmt1	Hist1h2ae	Hspb8	Tuba1b	Asap2			3.80225e-249	0	0	2.81934e-130	0	0	3.287e-152	2.54326e-249	0	5.66156e-51
Gnas	Gal	Clic1	Tubb5	Rpl10	Eif5a	Hmgb1	Ndufa4	Myom3	Lama4			4.15045e-246	0	0	1.23587e-129	0	0	6.1447e-151	4.50367e-244	0	2.64039e-50
Gpx3	Gas1	Cltc	Dnajc9	Rpl10a	Erh	Hmgb2	Synpo2l	Des	Lamp1			2.70384e-237	0	0	8.69906e-127	0	0	2.14288e-146	2.93123e-237	0	4.86835e-47
Gsn	Gem	Commd3	Lsm8	Rpl13a	Esd	Hmgn1	H19	Smim5	Epb41l2			3.58302e-235	0	0	4.65167e-122	0	0	2.25498e-146	6.9898e-236	0	5.74103e-47
H2-D1	Gm2000	Csf1	Pfn1	Rpl18a	Ezh2	Lig1	Cfl2	Gadd45a	Lhfp			1.08694e-233	0	0	7.92545e-120	0	0	5.46771e-146	8.48768e-233	0	8.8329e-47
Heyl	Gm26917	Cstb	Ppia	Rpl22l1	Fabp5	Lsm2	Cox6b1	Aldoa	Tmsb4x			3.19015e-229	0	0	1.14674e-118	0	0	1.22654e-142	2.0595e-218	0	3.60621e-46
Hmcn2	Gnas	CT025619.1	Ran	Rpl26	Fam111a	Mcm3	Actc1	Tnni1	Col4a2			9.91834e-228	0	0	2.27126e-116	0	0	5.77712e-141	6.5481e-213	0	1.01433e-45
Hspa1a	Gpx3	Esd	Tyms	Rpl27a	Fbxo5	Mki67	Mylpf	Tnnt2	Dlc1			1.92188e-225	0	0	3.68404e-103	0	0	1.07489e-140	2.54188e-209	0	1.80089e-45
Hspa1b	Gsn	Ftl1	Alyref	Rpl28	Fen1	Mrpl12	Neb	Ttn	Prss23			6.72445e-225	0	0	9.56021e-103	0	0	1.46439e-140	1.14173e-207	0	7.65498e-45
Hspa5	Hmcn2	Gng11	Anln	Rpl3	Ftl1	Myl9	Bin1	Myl1	Cpe			8.72773e-223	0	2.42155e-303	7.41072e-101	0	0	4.12186e-140	3.35329e-207	0	1.09242e-44
Ifitm3	Hspa1a	Gng2	Arhgap11a	Rpl32	Gins2	Nasp	mt-Nd2	Arl6ip5	Clic4			7.20552e-219	0	3.19078e-303	1.19974e-99	0	0	2.59557e-135	1.48522e-201	0	6.81628e-44
Ifrd1	Hspa1b	Gpx1	Aurka	Rplp0	Gmnn	Ndufa2	Atp5j2	Cobl	P4ha1			1.32104e-216	0	1.4691e-300	1.406e-99	0	0	2.65737e-134	3.10726e-201	0	1.23187e-43
Il17ra	Hspa5	Gpx8	Aurkb	Rplp1	Hat1	Ndufb7	Jam3	Rnf11	Emp2			4.63556e-205	0	1.71001e-300	1.37584e-98	0	0	1.95468e-129	7.38726e-198	0	6.15033e-43
Itih5	Ifrd1	Gstp1	Bub1	Rps12	Hells	Npm1	Tnnt1	Mylpf	Igfbp7			8.82026e-199	0	1.07678e-297	4.20896e-98	0	0	4.70852e-128	1.9759e-190	0	1.49665e-42
Jmjd1c	Il17ra	H2afj	Bub1b	Rps14	Hint1	Nucks1	Rnf7	Hspb3	Rsu1			6.1644e-196	0	4.22861e-297	1.01759e-96	0	0	7.20212e-128	1.99713e-187	0	2.49235e-42
Jund	Irs2	Hcfc1r1	Bub3	Rps15	Hist1h1a	Pclaf	Cox4i1	Spg21	Sipa1l1			9.99057e-194	0	6.37149e-297	1.25512e-94	0	0	8.03018e-128	2.71912e-177	0	6.83225e-42
Kdm6b	Jun	Hmga2	C330027C09Rik	Rps15a	Hist1h1b	Ppp1ca	Cdkn1a	Mybph	Postn			7.7934e-192	0	4.63594e-294	1.02064e-93	0	0	1.07894e-127	4.34343e-177	0	8.73425e-42
Klf4	Junb	Hmox1	Calm2	Rps16	Hist1h1e	Prc1	Cox7b	Itgb1bp2	Col11a1			9.63871e-192	0	9.27066e-293	2.75773e-93	0	0	3.31818e-127	6.95669e-177	0	3.32135e-41
Klf9	Jund	Igfbp7	Ccna2	Rps18	Hist1h2ae	Prmt1	Rbm24	Myog	Ctgf			4.2609e-190	0	7.0458e-283	4.36263e-93	0	0	8.05219e-126	1.95998e-173	0	5.56127e-41
Ltbp4	Kdm6b	Itpripl2	Ccnb1	Rps2	Hist1h3c	Ranbp1	Tnnt2	Mymk	Anxa5			7.98083e-190	0	1.6011e-274	1.21255e-92	0	0	3.37834e-124	9.58246e-172	0	1.15369e-40
Malat1	Klf4	Mgmt	Ccnb2	Rps20	Hspd1	Rnaseh2c	Myl4	Srl	Pdgfb			8.43123e-190	0	4.26871e-271	4.33638e-91	0	0	1.39707e-123	3.68863e-163	7.47711e-308	2.18351e-40
Mcl1	Klf9	Msn	Cdc20	Rps26	Hspe1	Rrm1	Pnmal2	Actc1	Timp3			1.25815e-187	0	9.66254e-270	3.54916e-90	0	0	3.73108e-123	6.66507e-160	2.34624e-304	4.13094e-40
Medag	Ltbp4	Mtpn	Cdca3	Rps4x	Lig1	Rrm2	Lrrn1	Gatm	Serpine2			2.59791e-187	0	6.48123e-269	1.27032e-89	0	0	2.20334e-118	1.23558e-156	1.66944e-302	4.89959e-40
Mt1	Maff	Myl6	Cenpa	Rps8	Lyar	Smc2	Jpt1	Chrng	Cystm1			1.16333e-186	0	1.88146e-265	2.06166e-88	0	0	4.04547e-118	9.56404e-155	2.32302e-298	8.17329e-40
Mt2	Mafk	Myof	Cenpe	Rps9	Mcm2	Smc4	Arpp21	Smyd1	Rhoa			3.13856e-183	0	1.54371e-262	4.69204e-88	0	0	2.42664e-116	9.84944e-151	7.67794e-298	1.01659e-39
Myc	Malat1	Npc2	Cenpq	S100a10	Mcm3	Snrpd1	Cox6c	Tmem38a	Flnb			3.7263e-181	0	9.17016e-261	2.08427e-85	0	0	3.61457e-116	8.43836e-150	5.48203e-294	1.1191e-39
Neat1	Mcl1	Nradd	Cenpw	S100a11	Mcm4	Snrpe	Svbp	Myh3	Tm4sf1			6.38302e-181	0	8.74848e-260	3.32735e-85	0	0	1.32683e-115	1.44102e-149	7.82489e-294	1.35606e-39
Nfia	Medag	Nt5c	Ckap2	S100a6	Mcm5	Spc24	Tpm2	Tnnt3	Fermt2			7.6535e-180	0	3.73361e-259	4.6826e-81	0	0	1.83002e-115	8.48022e-149	6.20128e-292	1.51022e-39
Nfib	Myf5	Ost4	Ckap2l	Sec61b	Mcm6	Srsf3	Smyd1	Tubb6	Fbln2			6.97268e-178	0	6.59516e-258	8.94595e-80	0	0	1.07732e-114	4.61657e-148	9.65398e-287	1.83001e-39
Nfkbia	Neat1	Ostf1	Ckap5	Serpinh1	Mcm7	Ssrp1	Parm1	Chrna1	Capg			3.25525e-174	0	7.3801e-258	2.30317e-77	0	0	2.5538e-114	5.2112e-148	1.52276e-283	1.25825e-38
Oaz1	Nfia	Pdia6	Cks2	Sh3bgrl3	Mif	Stmn1	Hes6	Tpm2	Cald1			2.08608e-169	0	1.39617e-256	2.91163e-77	0	0	2.37184e-112	6.77386e-148	7.14851e-282	1.92953e-38
Pde4b	Nfib	Pfn1	Cmc2	Slc25a4	Mrpl12	Stub1	Mb	Sox11	Lrrc8c			5.20135e-169	0	1.89247e-256	3.30864e-77	0	0	3.98772e-111	2.85187e-147	3.3575e-281	2.80334e-38
Pdlim4	Nfix	Phlda3	Dbf4	Sparc	Mrpl18	Tmpo	U2af1	Ckb	Dynlt3			3.37897e-167	0	3.18099e-254	4.81455e-77	0	0	1.71194e-108	1.23232e-146	1.77009e-278	5.8554e-38
Pdpn	Nfkbia	Prdx5	Diaph3	Spp1	Mtap	Tnnt1	Macf1	Mymx	Selenof			8.89825e-165	0	1.24781e-251	1.46482e-76	0	0	9.8435e-108	4.12894e-136	2.93191e-276	6.59207e-38
Pim1	Nop53	Rasa1	Dlgap5	Timp1	Nasp	Top2a	Gapdh	Eno3	Ctsl			1.17403e-164	0	5.31346e-249	7.65364e-76	0	0	1.90973e-106	3.64626e-135	6.32446e-275	2.47729e-37
Pmepa1	Notch3	Rexo2	Ect2	Tpm1	Ncl	Tpx2	Ckb	Synpo2l	Msn			1.41209e-163	0	1.0578e-248	1.18156e-75	0	0	3.88136e-106	1.18969e-131	1.10677e-272	2.59072e-37
Pnrc1	Nppc	Rpl19	H1fx	Tsc22d1	Nhp2	Tuba1b	Uqcr11	Klhl41	Fgf2			3.05076e-156	0	3.23554e-243	3.74579e-74	0	0	1.91967e-105	1.52037e-131	4.15891e-270	6.19682e-37
Ppp1r15a	Nr4a1	Rplp0	H2afz	Tspo	Nme1	Tubb4b	Top1	Hspb8	Ccnd2			3.22269e-156	0	1.04841e-242	5.02876e-74	0	0	3.22221e-104	1.04973e-130	3.12711e-267	1.11389e-36
Rarres2	Pax7	Rps27l	Hmgb3	Uba52	Nolc1	Tubb5	Chrna1	Pdlim3	Actr2			4.73906e-155	0	3.41859e-242	2.91249e-73	0	0	5.62199e-104	1.12415e-127	2.1174e-266	1.81819e-36
Rbms1	Pde4b	Rps6	Hmgn2	Vim	Npm1	Uqcr10	Atp5e	Acta2	Tagln2			8.62873e-155	0	6.55052e-242	7.64669e-71	0	0	1.60369e-102	6.65701e-127	1.0053e-262	2.7364e-36
Rhoj	Pdlim4	S100a10	Hmmr	Actb	Orc6	Actb	Spg21	Macf1	Tln1			9.8982e-154	0	2.80362e-241	2.74111e-70	0	0	1.8504e-102	5.20807e-125	1.23851e-262	3.70259e-36
Rnd3	Pdpn	S100a11	Incenp	Anxa2	Pcna	Anxa2	Tnni2	Atp2a1	Grb14			1.52074e-153	0	5.82882e-241	3.29185e-70	0	0	2.10777e-102	8.72113e-125	2.9917e-259	3.94952e-36
Rock2	Pnrc1	S100a6	Kif11	Atp5b	Ppa1	Atp5b	Ttn	Tnnc1	Sparc			1.70088e-153	0	1.95055e-239	7.81872e-70	0	0	3.70536e-102	3.87637e-123	3.57338e-248	4.03499e-36
Rora	Ppp1r15a	Scand1	Kif20b	Atp5c1	Ppat	Atp5c1	Zbtb18	Pgam2	Hbegf			1.9631e-153	0	1.47505e-238	1.50848e-69	0	0	3.75989e-102	6.87378e-123	3.59445e-248	4.82523e-36
Rpl23a	Prox1	Sec61b	Kif23	Cd63	Ppil1	Cd63	Purb	Nes	Actn4			4.58273e-153	0	1.71191e-236	3.3334e-69	0	0	4.44122e-102	1.03983e-122	8.29072e-248	4.82987e-36
Rpl36	Rora	Selenof	Kif2c	Clic1	Prim1	Clic1	Lima1	Scrib	Plxnd1			1.6563e-152	0	2.1691e-236	2.73917e-68	0	0	5.25117e-102	6.37592e-122	1.23307e-245	6.6563e-36
Rpl37	Rpl23a	Selenok	Kif4	Cox4i1	Psmc3ip	Cox4i1	Iffo1	Cavin4	Nid1			2.1614e-152	0	4.37281e-236	5.47942e-68	0	0	5.79928e-102	6.65056e-120	3.76875e-244	1.1044e-35
Rpl37a	Rpl36	Serpinb6a	Knl1	Cox8a	Rad51ap1	Cox8a	Olfml2b	Sypl	Angptl2			2.26716e-151	0	8.64193e-236	1.2461e-67	0	0	1.23535e-101	2.23301e-115	1.06847e-242	2.22195e-35
Rpl38	Rpl37	Sh3bgrl3	Lmnb1	Dpysl3	Rfc1	Dpysl3	Itm2b	Pkig	Gng11			2.60668e-151	0	4.24951e-235	2.248e-67	0	0	1.73538e-101	4.33064e-115	8.54472e-242	2.43024e-35
Rpl39	Rpl37a	Slc6a6	Lsm3	Emp3	Rfc3	Emp3	Mef2a	Sgcg	Anxa3			2.0557e-150	0	2.07403e-232	2.44592e-67	0	0	6.36903e-101	1.56598e-114	1.75619e-238	6.29914e-35
Rpl9-ps6	Rpl38	Smyd4	Lsm5	Eno1	Rfc4	Eno1	Ppib	Bag1	Dpysl2			3.01057e-148	0	1.94929e-230	2.91419e-67	0	0	1.41318e-100	6.76542e-114	6.92839e-238	3.13077e-34
Rps10	Rpl39	Soat1	Mad2l1	Ftl1	Rpa1	Ftl1	Eif2s2	Flnc	Myl6			1.30376e-147	0	8.26054e-230	4.20583e-65	0	0	2.47437e-100	4.73154e-112	2.76127e-233	3.40151e-34
Rps21	Rpl9-ps6	Sox4	Med30	Gas6	Rpa2	Gas6	Cox7a2	Palld	Arpc5			3.45558e-147	0	1.03972e-229	1.093e-63	0	0	1.37084e-99	1.35648e-111	2.80247e-232	3.54216e-34
Rps27	Rps10	Spcs1	Mis18bp1	Gm10076	Rps2	Gm10076	Cnot6l	Jpt1	Nr2f2			5.84426e-147	5.26341e-308	7.47602e-229	1.49765e-63	0	0	2.56793e-99	2.51905e-111	3.08131e-229	4.21744e-34
Rps29	Rps21	Spp1	Ncapd2	Gstp1	Rps27l	Gstp1	Cap2	Myh8	F3			5.02686e-140	9.02477e-307	1.38172e-228	6.18809e-63	0	0	2.30358e-98	2.65615e-111	1.07211e-228	4.58639e-34
Sdc4	Rps28	Sri	Ncapg	H19	Set	H19	Pkig	Neb	Jag1			3.20739e-137	2.94712e-306	5.6316e-227	9.31719e-62	0	0	1.97013e-97	2.04207e-110	5.89424e-226	8.29381e-34
Serping1	Rps29	Srp14	Nudcd2	Lgals1	Siva1	Lgals1	Tmsb4x	Tmsb10	Cspg4			6.10074e-133	7.7231e-302	1.48216e-225	2.01548e-60	0	0	2.19363e-97	3.58538e-110	7.68408e-222	2.47221e-33
Sgk1	Sdc4	Srpx2	Nuf2	Mest	Snrpe	Mest	Gm28653	Ldb3	Tkt			1.41558e-132	3.51975e-296	1.18027e-224	8.17422e-60	0	0	5.04642e-97	7.99925e-110	2.63912e-220	9.02476e-33
Slc38a2	Serping1	Timp1	Nusap1	mt-Nd1	Snrpf	mt-Nd1	Mymk	Mef2c	Col4a1			4.65047e-131	5.06055e-293	1.67761e-224	1.8449e-59	0	0	6.046e-97	5.62085e-109	9.00086e-218	2.1735e-32
Spag9	Sik1	Tm4sf1	Pbk	mt-Nd2	Spp1	mt-Nd2	Tnnt3	Cdkn1a	Itga1			2.0542e-130	6.34621e-293	2.98045e-224	7.75668e-59	0	0	9.16828e-97	1.96733e-108	7.97448e-215	2.61135e-32
Spsb1	Slc38a2	Tmem47	Plk1	mt-Nd4	Srsf3	mt-Nd4	Smim11	Enah	Vcl			4.2401e-126	2.33016e-292	7.27333e-223	9.20864e-59	0	0	9.85523e-97	2.26176e-107	7.5875e-214	2.70629e-32
Sqstm1	Socs3	Tns3	Psip1	Ndufa4	Srsf7	Ndufa4	Mymx	Lmod3	B2m			1.35452e-125	2.3806e-292	2.03071e-221	6.7435e-58	0	0	2.66264e-96	3.56332e-107	4.86611e-213	7.66676e-32
Srrm2	Sqstm1	Tomm5	Racgap1	Pkm	Timp1	Pkm	Acta2	Acta1	Akap12			1.82648e-124	3.81283e-290	4.05873e-221	6.91019e-58	0	0	4.16467e-96	5.44127e-105	1.26295e-212	2.51762e-31
Stat3	Tgfbr3	Tpt1	Rad21	Prdx1	Tipin	Prdx1	Kcnq1ot1	Popdc3	Col8a1			3.20358e-124	8.18745e-290	1.197e-220	4.52413e-55	0	0	1.33243e-95	4.91906e-104	4.15462e-212	3.54028e-31
Stk40	Tob2	Trappc4	Rangap1	Rpl12	Tk1	Rpl12	Pgam2	Cdkn1c	Iqgap1			2.17949e-123	2.85807e-287	2.51411e-218	8.64526e-55	0	0	2.67948e-95	5.62812e-104	7.19809e-212	5.43609e-31
Tgfbr3	Trib1	Tsc22d1	Sgo2a	Rpl41	Topbp1	Rpl41	2010107E04Rik	Fndc5	Itm2b			1.14309e-121	5.65033e-285	5.29031e-218	6.51745e-52	0	0	3.50122e-95	9.62378e-101	1.50017e-204	7.81967e-31
Trib1	Ubc	Tspo	Spc25	Rpsa	Txn1	Rpsa	D8Ertd738e	Crip2	Uchl1			1.87168e-121	5.22695e-283	2.41059e-217	1.06368e-51	0	0	4.99029e-95	1.38868e-99	3.6365e-203	1.03239e-30
Ubc	Zbtb20	Txn1	Spdl1	Sct	Uhrf1	Sct	Zfp106	Cfl2	Klk8			2.71981e-121	7.68635e-280	4.53746e-215	6.16935e-51	0	0	5.24575e-95	2.21157e-99	9.92939e-201	2.7334e-30
Xbp1	Zfp36	Txndc17	Tacc3	Serpinf1	Umps	Serpinf1	Gadd45g	Cox6a2	Serpinh1			2.83742e-121	1.97197e-278	1.16853e-214	1.15421e-49	0	0	7.02054e-95	5.76133e-99	5.24125e-200	2.8787e-30
Zbtb20	Zfp36l1	Unc5b	Trim59	Tppp3	Usp1	Tppp3	Cdkn1c	Trim55	Rras			3.99329e-121	4.88045e-277	2.24536e-213	6.19516e-49	0	0	9.34434e-95	4.86046e-98	7.09851e-196	4.10151e-30
Zfp36l1	Zfp36l2	Vim	Ube2c	Uqcr11	Ybx1	Uqcr11	Cryab	Actn2	Fam198b			6.91264e-121	4.54565e-276	5.97939e-213	9.67083e-49	0	0	2.39011e-94	8.76393e-98	7.58118e-193	5.08496e-30

## Sheet: Unique enrichments
M3+M5 (MS023) Unique	M1+M2+M4 (DMSO) Unique		M5 (MS023) Unique	M2+M4 (DMSO) Unique		M3 (MS023) Unique	M1 (DMSO) Unique
2010107E04Rik	0610012G03Rik		2010107E04Rik	1810037I17Rik		Actb	0610012G03Rik
Actb	1110008F13Rik		Actb	Abracl		Anxa2	1110008F13Rik
Anapc13	1110008P14Rik		Anapc13	Alyref		Atox1	1110008P14Rik
Anxa2	1810037I17Rik		Anxa2	Anln		Atp5b	2610001J05Rik
Atox1	2610001J05Rik		Atp5a1	Aprt		Atp5c1	Abracl
Atp5a1	Abracl		Atp5b	Arhgap11a		Calr	Ahnak2
Atp5b	Ahnak2		Atp5c1	Aurka		Cd81	Ak1
Atp5c1	Ak1		Atp5j2	Aurkb		Cdkn2a	Anxa1
Atp5j2	Alyref		Atp5k	Bub1		Col18a1	Arhgap22
Atp5k	Anln		Ccnd3	Bub1b		Cox4i1	Arpc1b
Calr	Anxa1		Cd63	Bub3		Cox7b	Arpc2
Ccnd3	Arhgap11a		Cdk4	C330027C09Rik		Cox8a	Ass1
Cd81	Arhgap22		Clic1	Calm2		Dpysl3	Atp6v0e
Cdk4	Arpc1b		Cox4i1	Ccna2		Eef1g	Atp6v1g1
Cdkn2a	Arpc2		Cox5a	Ccnb1		Emp3	Btf3
Col18a1	Ass1		Cox6c	Ccnb2		Eno1	Calm1
Cox4i1	Atp6v0e		Cox7a2	Ccnd1		Flna	Capg
Cox5a	Atp6v1g1		Cox8a	Ccne1		Gas6	Ccng1
Cox6c	Aurka		Crip2	Ccne2		Gm10076	Cd44
Cox7a2	Aurkb		Ddx39b	Cdc20		H19	Cdh11
Cox7b	Btf3		Dpysl3	Cdca3		Hsp90ab1	Cfl1
Cox8a	Bub1		Emp3	Cenpa		Hsp90b1	Chmp5
Crip2	Bub1b		Eno1	Cenpe		Lgals1	Chst2
Ddx39b	Bub3		Gapdh	Cenph		Lgals3	Cited2
Dpysl3	C330027C09Rik		Gas6	Cenpq		Mest	Cltc
Eef1g	Calm1		Gm10076	Cenpw		Mgp	Commd3
Emp3	Calm2		Gstp1	Cfl1		mt-Nd1	Cstb
Eno1	Capg		H19	Chaf1a		mt-Nd2	CT025619.1
Flna	Ccna2		Hmgn1	Ckap2		mt-Nd4	Esd
Gapdh	Ccnb1		Lgals1	Ckap2l		Naca	Gng11
Gas6	Ccnb2		Mest	Ckap5		Ndufa4	Gng2
Gm10076	Ccne1		mt-Nd1	Cks2		Peg3	Gpx8
H19	Ccne2		mt-Nd2	Clspn		Pgd	H2afj
Hmgn1	Ccng1		mt-Nd4	Cmc2		Pkm	Hcfc1r1
Hsp90ab1	Cd44		Myl9	Dbf4		Prdx1	Hmox1
Hsp90b1	Cdc20		Ndufa2	Dctpp1		Prdx2	Igfbp7
Lgals1	Cdca3		Ndufa4	Dhfr		Rack1	Itpripl2
Lgals3	Cdh11		Ndufb7	Diaph3		Rpl10	Mgmt
Mest	Cenpa		Pkm	Dlgap5		Rpl10a	Msn
Mgp	Cenpe		Ppp1ca	Dnajc9		Rpl12	Mtpn
mt-Nd1	Cenph		Prdx1	Dnmt1		Rpl13a	Myof
mt-Nd2	Cenpq		Prmt1	Ect2		Rpl18a	Nradd
mt-Nd4	Cenpw		Rnaseh2c	Eif5a		Rpl22l1	Nt5c
Myl9	Cfl1		Rpl12	Erh		Rpl26	Ost4
Naca	Chaf1a		Rpl41	Esd		Rpl27a	Ostf1
Ndufa2	Chmp5		Rpsa	Ezh2		Rpl28	Pfn1
Ndufa4	Chst2		Rrm1	Fabp5		Rpl3	Prdx5
Ndufb7	Cited2		Sct	Fam111a		Rpl32	Rexo2
Peg3	Ckap2		Serpinf1	Fbxo5		Rpl41	Rpl19
Pgd	Ckap2l		Ssrp1	Fen1		Rplp1	Rps27l
Pkm	Ckap5		Stub1	Gins2		Rps12	Rps6
Ppp1ca	Cks2		Tnnt1	H1fx		Rps14	Scand1
Prdx1	Clspn		Tppp3	H2afz		Rps15	Selenof
Prdx2	Cltc		Tuba1b	Hat1		Rps15a	Selenok
Prmt1	Cmc2		Uqcr10	Hells		Rps16	Serpinb6a
Rack1	Commd3		Uqcr11	Hist1h1a		Rps18	Slc6a6
Rnaseh2c	Cstb			Hist1h1e		Rps2	Smyd4
Rpl10	CT025619.1			Hist1h3c		Rps20	Soat1
Rpl10a	Dbf4			Hmgb3		Rps26	Sox4
Rpl12	Dctpp1			Hmgn2		Rps4x	Spcs1
Rpl13a	Dhfr			Hmmr		Rps8	Sri
Rpl18a	Diaph3			Hspd1		Rps9	Srp14
Rpl22l1	Dlgap5			Hspe1		Rpsa	Srpx2
Rpl26	Dnajc9			Incenp		Sct	Tm4sf1
Rpl27a	Dnmt1			Kif11		Serpinf1	Tmem47
Rpl28	Ect2			Kif20b		Serpinh1	Tns3
Rpl3	Eif5a			Kif23		Slc25a4	Tomm5
Rpl32	Erh			Kif2c		Sparc	Tpt1
Rpl41	Esd			Kif4		Tpm1	Trappc4
Rplp1	Ezh2			Knl1		Tppp3	Txn1
Rps12	Fabp5			Lmnb1		Uba52	Txndc17
Rps14	Fam111a			Lsm3		Uqcr11	Unc5b
Rps15	Fbxo5			Lsm5
Rps15a	Fen1			Lsm8
Rps16	Gins2			Lyar		Duplicates
Rps18	Gng11			Mad2l1
Rps20	Gng2			Mcm2		Aprt
Rps26	Gpx8			Mcm4		Atpif1	Aprt
Rps4x	H1fx			Mcm5		Bax	Atpif1
Rps8	H2afj			Mcm6		Cald1	Bax
Rps9	H2afz			Mcm7		Ccnd1	Cald1
Rpsa	Hat1			Med30		Cd63	Ccnd1
Rrm1	Hcfc1r1			Mif		Clic1	Cd63
Sct	Hells			Mis18bp1		Csf1	Clic1
Serpinf1	Hist1h1a			Mrpl18		Ftl1	Csf1
Serpinh1	Hist1h1e			Mtap		Gpx1	Ftl1
Slc25a4	Hist1h3c			Ncapd2		Gstp1	Gpx1
Sparc	Hmgb3			Ncapg		Hmga2	Gstp1
Ssrp1	Hmgn2			Ncl		Myl6	Hmga2
Stub1	Hmmr			Nhp2		Npc2	Myl6
Tnnt1	Hmox1			Nme1		Pdia6	Npc2
Tpm1	Hspd1			Nolc1		Phlda3	Pdia6
Tppp3	Hspe1			Nudcd2		Rasa1	Phlda3
Tuba1b	Igfbp7			Nuf2		Rplp0	Rasa1
Uba52	Incenp			Nusap1		S100a10	Rplp0
Uqcr10	Itpripl2			Orc6		S100a11	S100a10
Uqcr11	Kif11			Pbk		S100a6	S100a11
	Kif20b			Pcna		Sec61b	S100a6
	Kif23			Pfn1		Sh3bgrl3	Sec61b
	Kif2c			Plk1		Spp1	Sh3bgrl3
	Kif4			Ppa1		Timp1	Spp1
	Knl1			Ppat		Tsc22d1	Timp1
	Lmnb1			Ppia		Tspo	Tsc22d1
	Lsm3			Ppil1		Vim	Tspo
	Lsm5			Prim1			Vim
	Lsm8			Psip1
	Lyar			Psmc3ip
	Mad2l1			Racgap1
	Mcm2			Rad21
	Mcm4			Rad51ap1
	Mcm5			Ran
	Mcm6			Rangap1
	Mcm7			Rfc1
	Med30			Rfc3
	Mgmt			Rfc4
	Mif			Rpa1
	Mis18bp1			Rpa2
	Mrpl18			Rps2
	Msn			Rps27l
	Mtap			Set
	Mtpn			Sgo2a
	Myof			Siva1
	Ncapd2			Snrpf
	Ncapg			Spc25
	Ncl			Spdl1
	Nhp2			Spp1
	Nme1			Srsf7
	Nolc1			Tacc3
	Nradd			Timp1
	Nt5c			Tipin
	Nudcd2			Tk1
	Nuf2			Topbp1
	Nusap1			Trim59
	Orc6			Txn1
	Ost4			Tyms
	Ostf1			Ube2c
	Pbk			Uhrf1
	Pcna			Umps
	Pfn1			Usp1
	Plk1			Ybx1
	Ppa1
	Ppat		Duplicates
	Ppia		Anp32b
	Ppil1		Arl6ip1	Anp32b
	Prdx5		Atad2	Arl6ip1
	Prim1		Birc5	Atad2
	Psip1		Ccdc34	Birc5
	Psmc3ip		Cdca8	Ccdc34
	Racgap1		Cdk1	Cdca8
	Rad21		Cenpf	Cdk1
	Rad51ap1		Cks1b	Cenpf
	Ran		Dek	Cks1b
	Rangap1		Dut	Dek
	Rexo2		Ftl1	Dut
	Rfc1		Gmnn	Ftl1
	Rfc3		H2afv	Gmnn
	Rfc4		H2afx	H2afv
	Rpa1		Hint1	H2afx
	Rpa2		Hist1h1b	Hint1
	Rpl19		Hist1h2ae	Hist1h1b
	Rps27l		Hmgb1	Hist1h2ae
	Rps6		Hmgb2	Hmgb1
	Scand1		Lig1	Hmgb2
	Selenof		Lsm2	Lig1
	Selenok		Mcm3	Lsm2
	Serpinb6a		Mki67	Mcm3
	Set		Mrpl12	Mki67
	Sgo2a		Nasp	Mrpl12
	Siva1		Npm1	Nasp
	Slc6a6		Nucks1	Npm1
	Smyd4		Pclaf	Nucks1
	Snrpf		Prc1	Pclaf
	Soat1		Ranbp1	Prc1
	Sox4		Rrm2	Ranbp1
	Spc25		Smc2	Rrm2
	Spcs1		Smc4	Smc2
	Spdl1		Snrpd1	Smc4
	Sri		Snrpe	Snrpd1
	Srp14		Spc24	Snrpe
	Srpx2		Srsf3	Spc24
	Srsf7		Stmn1	Srsf3
	Tacc3		Tmpo	Stmn1
	Tipin		Top2a	Tmpo
	Tk1		Tpx2	Top2a
	Tm4sf1		Tubb4b	Tpx2
	Tmem47		Tubb5	Tubb4b
	Tns3			Tubb5
	Tomm5
	Topbp1
	Tpt1
	Trappc4
	Trim59
	Txn1
	Txndc17
	Tyms
	Ube2c
	Uhrf1
	Umps
	Unc5b
	Usp1
	Ybx1
Duplicates
Anp32b
Aprt	Anp32b
Arl6ip1	Aprt
Atad2	Arl6ip1
Atpif1	Atad2
Bax	Atpif1
Birc5	Bax
Cald1	Birc5
Ccdc34	Cald1
Ccnd1	Ccdc34
Cd63	Ccnd1
Cdca8	Cd63
Cdk1	Cdca8
Cenpf	Cdk1
Cks1b	Cenpf
Clic1	Cks1b
Csf1	Clic1
Dek	Csf1
Dut	Dek
Ftl1	Dut
Gmnn	Ftl1
Gpx1	Gmnn
Gstp1	Gpx1
H2afv	Gstp1
H2afx	H2afv
Hint1	H2afx
Hist1h1b	Hint1
Hist1h2ae	Hist1h1b
Hmga2	Hist1h2ae
Hmgb1	Hmga2
Hmgb2	Hmgb1
Lig1	Hmgb2
Lsm2	Lig1
Mcm3	Lsm2
Mki67	Mcm3
Mrpl12	Mki67
Myl6	Mrpl12
Nasp	Myl6
Npc2	Nasp
Npm1	Npc2
Nucks1	Npm1
Pclaf	Nucks1
Pdia6	Pclaf
Phlda3	Pdia6
Prc1	Phlda3
Ranbp1	Prc1
Rasa1	Ranbp1
Rplp0	Rasa1
Rps2	Rplp0
Rrm2	Rps2
S100a10	Rrm2
S100a11	S100a10
S100a6	S100a11
Sec61b	S100a6
Sh3bgrl3	Sec61b
Smc2	Sh3bgrl3
Smc4	Smc2
Snrpd1	Smc4
Snrpe	Snrpd1
Spc24	Snrpe
Spp1	Spc24
Srsf3	Spp1
Stmn1	Srsf3
Timp1	Stmn1
Tmpo	Timp1
Top2a	Tmpo
Tpx2	Top2a
Tsc22d1	Tpx2
Tspo	Tsc22d1
Tubb4b	Tspo
Tubb5	Tubb4b
Vim	Tubb5
	Vim
