# Supplementary material for: Inhibition of type I PRMTs reforms muscle stem cell identity enhancing their therapeutic capacity
Source: eLife. 2023 Jun 7;12:RP84570. doi: 10.7554/eLife.84570 (PMC10328524; doi:10.7554/eLife.84570)
Supplement: Supplementary file 2. [file elife-84570-supp2.xlsx]

## Sheet: Sheet1
	d0	d4	d6	d4 MS023	d6 MS023rd4			d0_p	d4_p	d6_p	d4 MS023_p	d6 MS023rd4_p
0	Adamts1	1110008F13Rik	0610009B22Rik	2010107E04Rik	2010107E04Rik			0	0	0	0	0
1	Ahnak	2610001J05Rik	1500009L16Rik	Actb	Acta1			0	0	0	0	0
2	Anxa5	Ak6	Abracl	Anapc13	Acta2			0	0	0	0	0
3	Arid5b	Alyref	Acta2	Atp5a1	Actc1			0	0	0	0	0
4	Arl4d	Anp32b	Ak1	Atp5b	Actn2			0	0	0	0	0
5	AY036118	Aprt	Amotl2	Atp5c1	Aldoa			0	0	4.49627e-287	0	0
6	Bag3	Atp6v1g1	Atp5g2	Atp5j2	Atp5a1			0	0	8.16667e-274	0	5.03196e-288
7	Btg1	Bax	Atp5g3	Atp5k	Atp5b			0	0	2.53614e-261	0	7.41848e-283
8	Btg2	Bcas2	Btf3	Atpif1	Atp5c1			0	0	3.38109e-254	0	1.8556e-261
9	Cavin2	Birc5	Cbx5	Cd63	Atp5d			0	0	8.21126e-252	0	2.04002e-257
10	Ccnl1	Btf3	Ccng1	Clic1	Atp5e			0	0	1.17609e-251	0	2.2853e-257
11	Cd200	Cacybp	Cdc42ep3	Col18a1	Atp5f1			0	0	5.19184e-251	0	5.39353e-256
12	Cebpb	Ccnd1	Cdh11	Cox4i1	Atp5g1			0	0	7.13845e-249	0	4.77958e-246
13	Cebpd	Cd44	Cdh2	Cox5a	Atp5h			0	0	4.97279e-245	0	3.89713e-238
14	Cfh	Cdv3	Cdkn1a	Cox5b	Atp5j			0	0	1.43625e-244	0	7.60606e-235
15	Chodl	Cfl1	Chmp5	Cox7b	Atp5j2			0	0	2.96147e-243	0	1.20559e-215
16	Chrdl2	Cks1b	Chrna1	Cox8a	Atp5k			0	0	1.03121e-231	0	1.34912e-210
17	Clmn	Cks2	Cisd1	Crip2	Bin1			0	0	7.59238e-230	0	7.37963e-194
18	Crlf1	Cnih4	Cmpk1	Dbi	Ccnd3			0	0	3.42114e-222	0	1.03027e-188
19	Ctsl	Csf1	Commd3	Ddx39b	Cd81			0	0	2.35908e-219	0	7.48788e-185
20	Dag1	Dctpp1	Cox14	Dpysl3	Cdkn1a			0	0	1.0397e-216	0	1.5537e-183
21	Ddx5	Denr	Cox6c	Emp3	Cdkn1c			0	0	6.53709e-213	0	8.49421e-179
22	Dpt	Dkc1	Cox7c	Eno1	Chrna1			0	0	2.17013e-212	0	2.16967e-169
23	Eef1a1	Dnajc2	Cryab	Fth1	Cox4i1			0	0	6.41565e-211	0	4.29838e-164
24	Egr1	Dnajc9	Dapk2	Gapdh	Cox5a			0	0	1.22741e-209	0	5.19741e-162
25	Errfi1	Dut	Dynll1	Gm10076	Cox5b			0	0	9.33656e-207	0	1.49207e-152
26	Fgfr1	Ebna1bp2	Eef1e1	Gstp1	Cox6b1			0	0	2.37476e-203	0	9.92818e-149
27	Flnc	Eef1e1	Eloc	H19	Cox6c			0	0	1.29665e-202	0	1.02605e-147
28	Fos	Eif2s1	Fabp5	Hes6	Cox7a2			0	0	8.58958e-201	0	5.07649e-144
29	Fosb	Eif5a	Fat1	Hint1	Cox7b			0	0	1.13388e-200	0	2.31925e-132
30	Frmd6	Erh	Glrx2	Hmgb1	Cox8a			0	0	3.32706e-197	9.7429e-308	5.7894e-126
31	Gal	Esd	Gng2	Hsp90ab1	Crip2			0	0	1.17402e-195	1.19504e-299	4.87077e-123
32	Gem	Fam19a5	Gng5	Id1	Cryab			0	0	1.44221e-195	3.29414e-294	2.42543e-122
33	Gm26917	Gar1	Gpx4	Lgals1	Cst3			0	0	2.64153e-194	1.47947e-292	2.93594e-121
34	Gnas	Gemin6	Gtf2a2	Lgals3	D8Ertd738e			0	0	4.57718e-194	4.43436e-288	3.87512e-115
35	Gpx3	Glrx5	H2afj	Mest	Des			0	0	8.11306e-194	1.43852e-287	7.68202e-115
36	Gsn	Gspt1	Hsbp1	Mrpl12	Elob			0	0	3.42871e-192	5.03209e-278	1.6431e-113
37	H2-D1	H2afj	Igfbp3	mt-Nd1	Eno1			0	0	6.10474e-192	2.00676e-274	3.05654e-113
38	Hmcn2	Hmgb3	Igfbp7	mt-Nd2	Gapdh			0	0	1.95815e-191	6.27656e-271	1.72872e-110
39	Hspa1a	Hspd1	Inppl1	mt-Nd4	Gpx4			0	0	3.19189e-190	3.2947e-267	5.79336e-110
40	Hspa1b	Id2	Islr	Myl9	H19			0	0	2.581e-187	1.26377e-256	2.92912e-109
41	Hspa5	Idh3a	Itga6	Myod1	H2afv			0	0	9.16871e-185	4.17258e-253	1.00866e-107
42	Ifitm3	Lsm5	Kremen1	Ndufa2	Hes6			0	0	5.03508e-182	6.04871e-253	5.22947e-106
43	Ifrd1	Lsm8	Leprotl1	Ndufa4	Islr			0	0	5.75468e-181	9.49714e-251	4.3031e-104
44	Il17ra	Magohb	Lrrn1	Ndufs7	Itm2a			0	0	1.82075e-178	2.73627e-242	8.83804e-100
45	Itih5	Mrpl18	Lsm8	Pdap1	Itm2b			0	0	6.5544e-177	8.7921e-236	1.3837e-99
46	Junb	Mrpl20	Magohb	Pgd	Jpt1			0	0	2.62977e-176	2.05822e-234	6.49163e-97
47	Jund	Mtap	Map2k1	Pkm	Ldha			0	0	1.7315e-175	3.9023e-234	1.20168e-93
48	Kdm6b	Myof	Med30	Ppp1ca	Lgals1			0	0	1.1358e-174	4.61035e-229	1.63849e-93
49	Klf4	Naa20	Mrpl33	Prdx1	Lsm6			0	0	8.5247e-174	6.33086e-226	2.05698e-93
50	Klf9	Ncl	Myl12a	Prdx6	Mef2c			0	0	9.21637e-174	9.85269e-224	5.33852e-92
51	Ltbp4	Nhp2	Myo10	Prmt1	Mest			0	0	9.5808e-174	1.58136e-213	3.65372e-91
52	Mafk	Nme1	Ndufa1	Psma4	mt-Nd1			0	0	7.8028e-172	2.84307e-213	4.47245e-90
53	Malat1	Nudcd2	Ndufs4	Rack1	mt-Nd2			0	0	1.09779e-170	4.1611e-212	5.47722e-90
54	Mcl1	Pabpc1	Ndufs5	Rpl10a	mt-Nd4			0	0	2.16608e-170	1.57133e-209	1.74746e-89
55	Medag	Pak1	Neb	Rpl12	Myh3			0	0	2.66762e-170	4.1436e-209	6.14332e-89
56	Mt1	Pclaf	Nes	Rpl13a	Myl1			0	0	8.84192e-169	4.64703e-206	7.05027e-86
57	Mt2	Pfdn4	Nexn	Rpl18a	Myl12a			0	0	1.2507e-168	3.46362e-205	3.66676e-85
58	Myf5	Pfn1	Nudcd2	Rpl22l1	Myl4			0	0	8.45144e-167	3.5078e-199	5.82863e-85
59	Neat1	Pno1	Ost4	Rpl26	Mylpf			0	0	4.10894e-166	1.66154e-196	1.35307e-84
60	Nfia	Polr3k	Parm1	Rpl28	Mymk			0	0	8.60782e-165	2.79673e-196	1.79521e-81
61	Nfib	Ppa1	Pdcl3	Rpl3	Mymx			0	0	1.40817e-164	3.15042e-192	2.45609e-81
62	Nfkbia	Ppia	Pfdn4	Rpl35	Myog			0	0	5.63412e-164	3.73552e-191	6.40081e-80
63	Nop53	Ppic	Pfn1	Rpl41	Ndufa11			0	1.41937e-306	1.93616e-162	7.20898e-189	3.12259e-77
64	Notch3	Rad50	Phlda1	Rplp1	Ndufa13			0	1.15938e-304	2.66002e-162	9.12195e-188	2.4729e-76
65	Oaz1	Ran	Plod2	Rplp2	Ndufa2			0	3.31161e-304	2.79065e-162	1.40704e-187	2.76232e-75
66	Pax7	Rcc2	Ppia	Rps11	Ndufa4			0	7.76605e-304	1.01049e-160	7.92295e-186	1.51423e-70
67	Pde4b	Rps27l	Rbx1	Rps12	Ndufb5			0	1.25966e-300	4.72298e-160	2.23332e-184	2.86677e-70
68	Pdlim4	Rps6	Rheb	Rps15	Ndufb7			0	1.97212e-300	4.93667e-159	1.53081e-183	7.72694e-70
69	Pdpn	Rrm2	Rnf7	Rps16	Ndufc1			0	1.08643e-299	1.08182e-158	1.85622e-171	2.18018e-65
70	Pim1	Rsl24d1	Rps27l	Rps20	Ndufs6			0	1.81278e-298	8.11791e-158	1.97272e-171	5.29148e-62
71	Pnrc1	Sdhd	Rps6	Rps26	Neb			0	5.1962e-297	2.43168e-157	3.60138e-170	3.27292e-59
72	Ppp1r15a	Sec61b	S100a10	Rps27a	Nes			0	1.25066e-296	7.13146e-157	1.51988e-168	4.00882e-59
73	Prox1	Selenof	S100a11	Rps8	Peg3			0	3.02433e-295	2.07229e-156	6.57303e-168	5.7286e-59
74	Rarres2	Set	Sdhaf4	Rps9	Pkig			0	9.96302e-295	4.69626e-156	3.76043e-167	1.02957e-55
75	Rhoj	Smyd4	Sdhd	Rpsa	Prdx2			0	2.69999e-294	6.36479e-156	4.70376e-167	2.62892e-55
76	Rnd3	Snhg6	Sem1	S100a6	Prmt1			0	1.97557e-292	1.17487e-154	5.56014e-166	8.24927e-52
77	Rora	Snrpf	Serf1	Sct	Psmb1			0	4.06221e-292	1.72634e-154	3.97372e-165	6.47746e-51
78	Rpl23a	Spc24	Serf2	Serpinf1	Rbx1			0	2.92329e-291	4.87923e-154	1.41504e-159	1.7858e-50
79	Rpl36	Srsf9	Sh3glb1	Sf3b2	Rps15a			0	1.55457e-290	1.33559e-153	4.96977e-158	3.20343e-49
80	Rpl37	Ssbp1	Shisa2	Sh3bgrl3	Sct			0	2.0807e-290	1.41504e-153	4.96079e-157	3.36957e-49
81	Rpl37a	Thyn1	Skp1a	Slc25a3	Serpinf1			0	1.71251e-289	7.30924e-153	2.51399e-156	5.09387e-49
82	Rpl38	Timp1	Slc6a6	Stub1	Slc25a3			0	6.8463e-288	1.13193e-152	3.40135e-154	9.9639e-48
83	Rpl39	Tipin	Snhg6	Tmsb10	Slc25a4			0	1.00526e-287	2.9254e-152	8.87244e-154	1.05268e-47
84	Rpl9-ps6	Tns3	Sox11	Tpm1	Sparc			0	6.64591e-287	1.08231e-151	1.06885e-152	1.13319e-47
85	Rps10	Tomm5	Spcs1	Tppp3	Svbp			0	3.37632e-286	1.93659e-151	1.70143e-151	1.85871e-47
86	Rps21	Tomm70a	Spry2	Tspo	Tmsb4x			0	7.30466e-284	9.44087e-151	9.57645e-150	2.46857e-47
87	Rps29	Tpm4	Srp9	Uqcr10	Tnnc1			0	2.50641e-280	1.53546e-149	4.78594e-149	3.96316e-45
88	Sdc4	Ybx1	Ssu72	Uqcr11	Tnni1			0	1.86102e-279	2.25321e-149	1.6919e-148	5.90233e-45
89	Serping1		Svbp		Tnnt1			0	2.26314e-279	3.37715e-149	3.01892e-148	7.51939e-45
90	Sgk1		Tma7		Tnnt2			0	3.54491e-279	7.72091e-149	1.09894e-146	1.48133e-44
91	Sik1		Tmem47		Tnnt3			0	1.1408e-278	3.17223e-148	5.1998e-146	7.73336e-44
92	Slc38a2		Tmsb10		Tpm2			0	6.72926e-278	3.41399e-147	5.48957e-145	2.17362e-43
93	Sqstm1		Tmsb4x		Tpt1			0	5.94572e-277	4.19946e-147	1.15897e-144	2.25912e-42
94	Stat3		Tnnc1		Ttn			0	5.94702e-275	1.37399e-145	5.65807e-143	6.08445e-42
95	Tgfbr3		Tpm2		Uqcr10			0	1.79864e-273	4.19001e-145	7.19682e-143	1.04894e-41
96	Trib1		Tpt1		Uqcr11			0	1.85179e-272	6.83067e-145	9.59805e-143	1.4854e-41
97	Ubc	Duplicates:	Unc5b		Uqcrh			0	1.98191e-272	3.67638e-144	7.15263e-142	1.62352e-41
98	Zbtb20	Ftl1	Usmg5	Duplicates:	Uqcrq			0	2.09262e-272	5.333e-144	2.10813e-141	1.23216e-40
99	Zfp36l1	Gclm	Zcrb1	Ftl1	Usmg5			0	2.7552e-272	1.07084e-143	6.07294e-138	7.96372e-40
		Hmga2		Gclm
		Mif		Hmga2
		Npm1		Mif
		Ranbp1		Npm1
		Rasa1		Ranbp1
		Rplp0		Rasa1
		Rps2		Rplp0
		Spp1		Rps2
		Txn1		Spp1
				Txn1
