# Supplementary material for: Inhibition of type I PRMTs reforms muscle stem cell identity enhancing their therapeutic capacity
Source: eLife. 2023 Jun 7;12:RP84570. doi: 10.7554/eLife.84570 (PMC10328524; doi:10.7554/eLife.84570)
Supplement: Supplementary file 3. — The number of cells and the percentage distributed within clusters Q1, Q2, C1, M1, M2, M3, M4, M5, DM1 and DM2 is indicated. [file elife-84570-supp3.xlsx]

## Sheet: Sheet1
Cluster	d0	d4	d4 ms023	d6	d6 ms023
Q1	1863	0	0	0	0
Q2	1901	0	0	0	0
C1	66	28	2	100	3
M1	0	761	51	897	90
M2	0	1277	163	1068	95
M3	0	97	999	138	895
M4	0	1450	277	627	73
M5	0	177	2185	190	1436
DM1	1	115	157	447	820
DM2	0	16	30	414	528

## Sheet: Sheet2
Cluster	d0	Proportion (%)	d4	Proportion (%)	d4MS023	Proportion (%)	d6	Proportion (%)	d6MS023rd4	Proportion (%)
Q1	1863	48.6296	0	0	0	0	0	0	0	0
Q2	1901	49.6215	0	0	0	0	0	0	0	0
C1	66	1.72279	28	0.714104	2	0.0517598	100	2.57666	3	0.0761421
M1	0	0	761	19.4083	51	1.31988	897	23.1126	90	2.28426
M2	0	0	1277	32.5682	163	4.21843	1068	27.5187	95	2.41117
M3	0	0	97	2.47386	999	25.854	138	3.55578	895	22.7157
M4	0	0	1450	36.9804	277	7.16874	627	16.1556	73	1.85279
M5	0	0	177	4.51415	2185	56.5476	190	4.89565	1436	36.4467
DM1	1	0.0261028	115	2.93293	157	4.06315	447	11.5177	820	20.8122
DM2	0	0	16	0.408059	30	0.776398	414	10.6674	528	13.401
