# Supplementary figures and images for: Inhibition of type I PRMTs reforms muscle stem cell identity enhancing their therapeutic capacity
Source: eLife journal article supplement (doi:10.7554/elife.84570), 2023-03-03

Figure 1- Source data

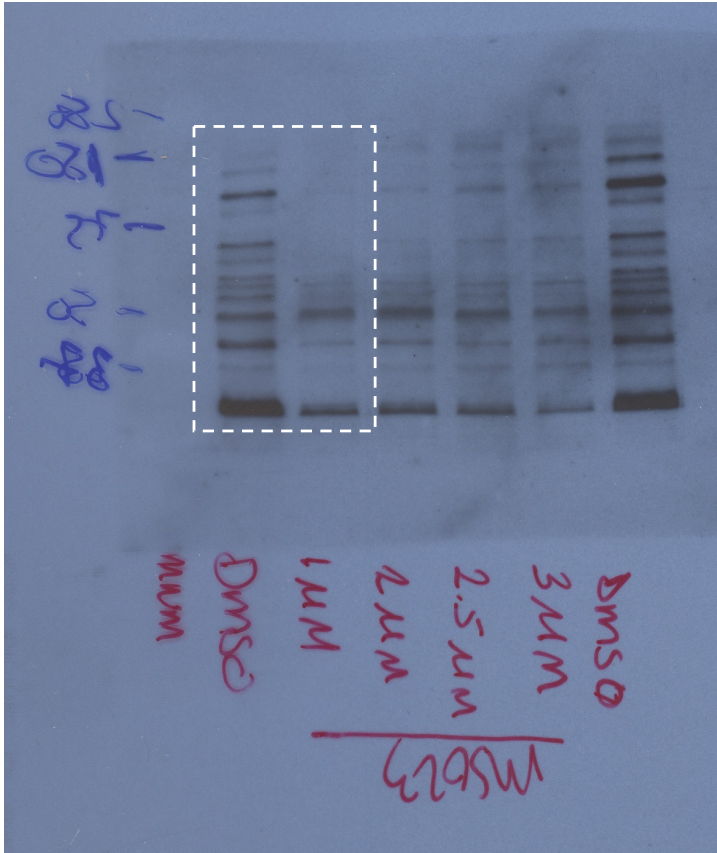

Supplement: fig1-figsupp1-data1 [file elife-84570-fig1-figsupp1-data1-v1.zip]

Figure 6- Source data

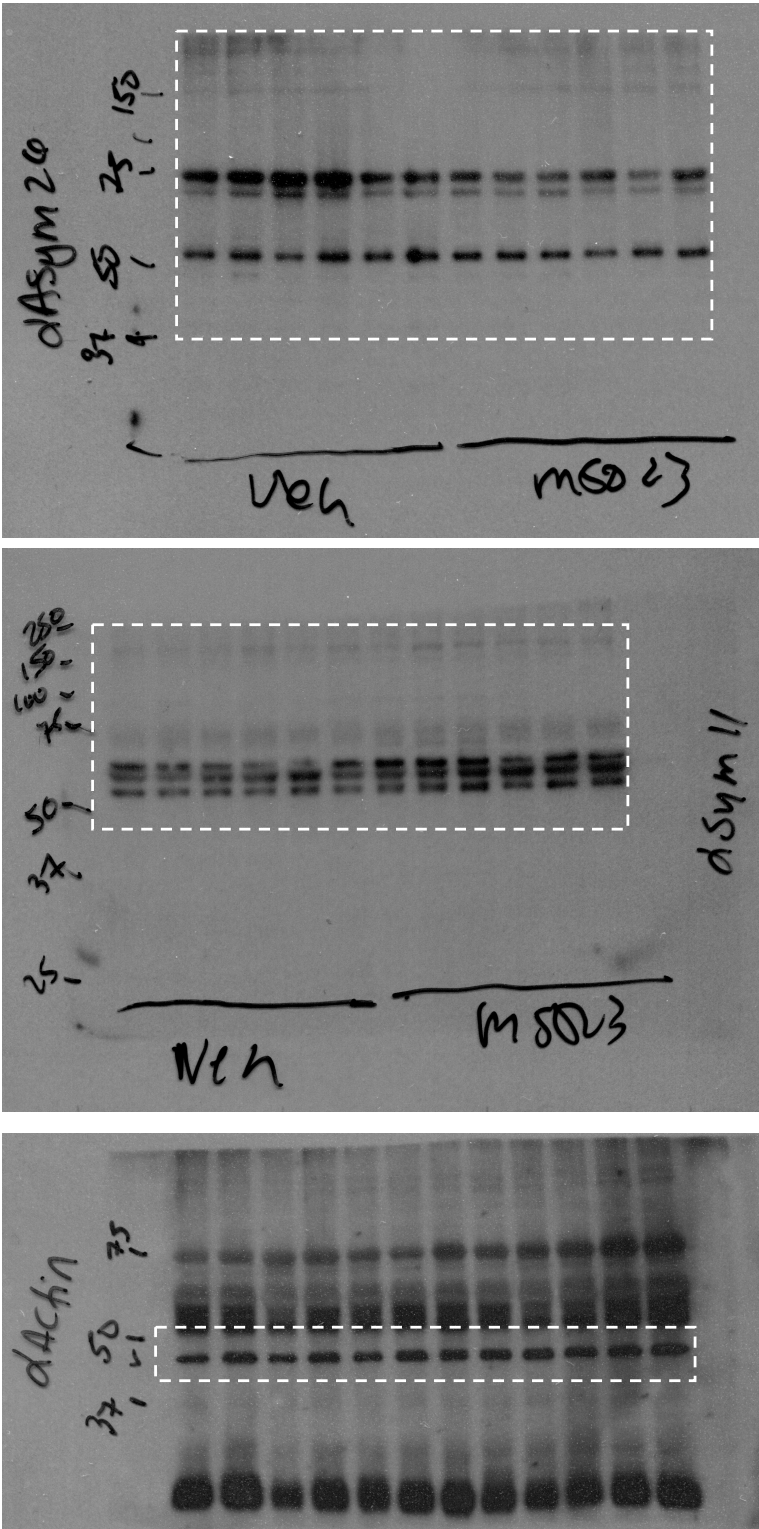

Supplement: fig6-figsupp1-data1 [file Figure6-SourceData.pdf › Figure6-SourceData.pdf]
